# Supplementary material
Source: PubMed Central journal article supplement (PMC3898944)

**Supplementary Figure 1: Flow chart of case ascertainment and recruitment**

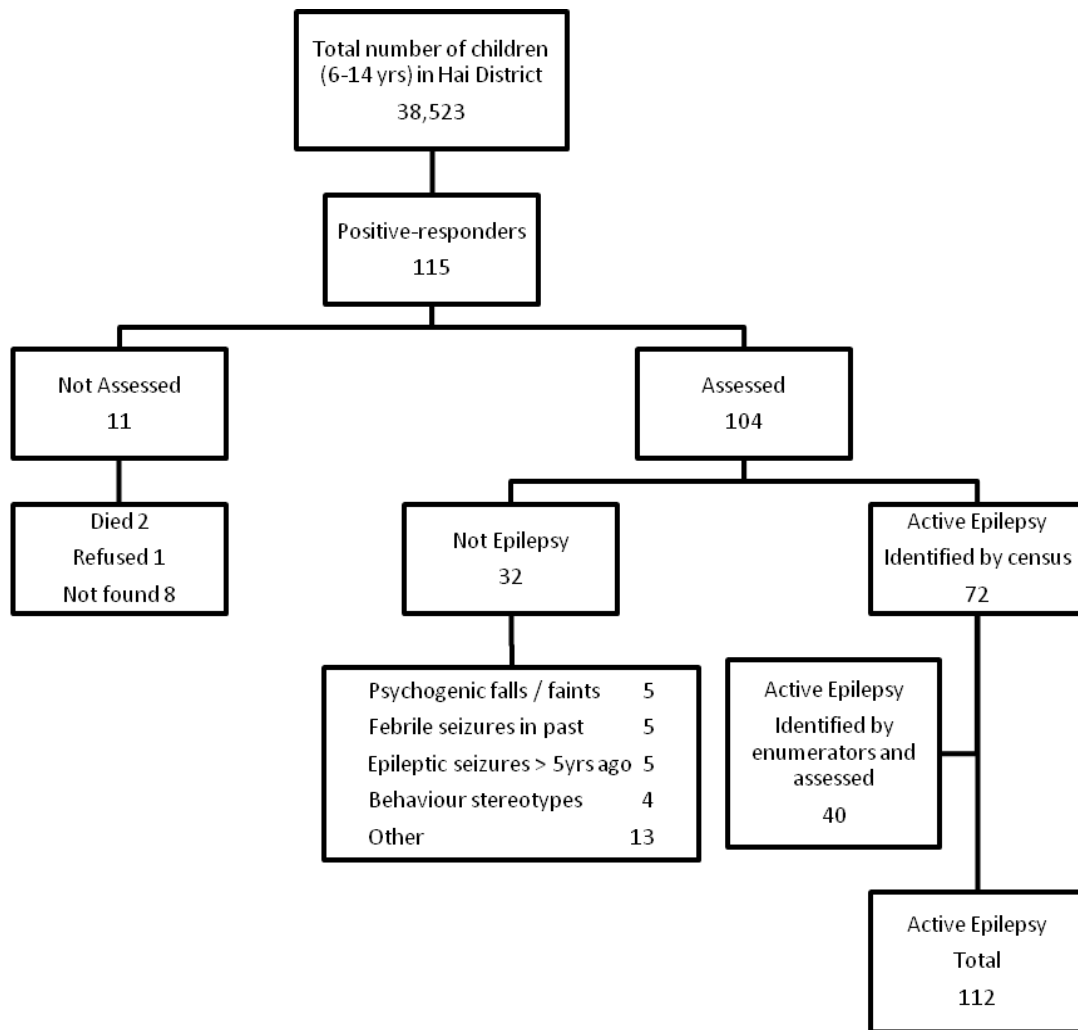

Supplement: mmc1.pdf [file mmc1.pdf]
